# Supplementary material for: High-Quality GaSe Single Crystal Grown by the Bridgman Method
Source: MDPI journal article supplement (doi:10.3390/ma11020186), 2018-01-24
Supplement: s1 [file s1]

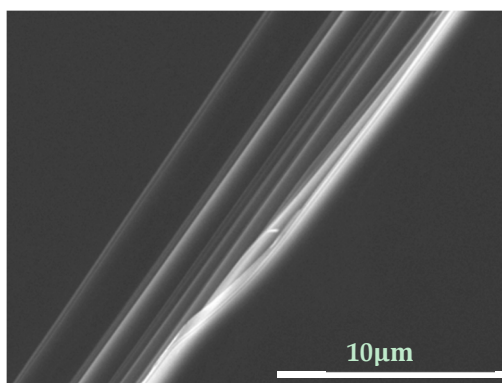

**Figure S1.** SEM pictures of GaSe (001) face

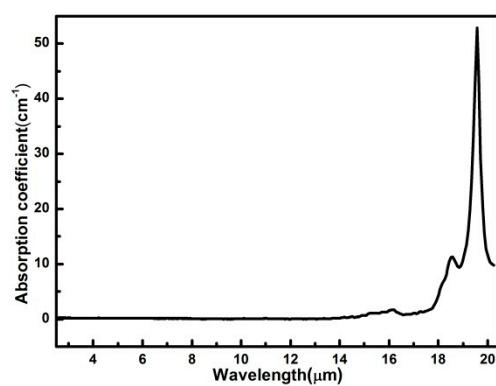

**Figure S2.** Calculated absorption coefficient of GaSe crystals
